# Supplementary material
Source: PubMed Central journal article supplement (PMC6283500)
Supplement: tpmd180538.SD2.pdf [file tpmd180538.SD2.pdf]

**Supplementary Table 1: Primers and probes used in the multiplex real-time PCR for detection of parasites**

| <i>Organism</i>              | <i>Gene</i> | Primer/Probe name        | Sequence                                      |
|------------------------------|-------------|--------------------------|-----------------------------------------------|
| <i>Giardia lamblia</i>       | ss-rRNA     | Forward primer           | GACGGCTCAGGACAACGGTT                          |
|                              |             | Reverse primer           | TTGCCAGCGGTGTCCG                              |
|                              |             | Probe                    | FAM-CCCGCGGGCGGTCCCTGCTAG-DDQ1                |
| <i>Cryptosporidium</i> spp.  | COW P       | Forward primer           | CAAATTGATACCGTTTGTCTTCTG                      |
|                              |             | Reverse primer           | GGCATGTCGATTCTAATTCAGCT                       |
|                              |             | Probe                    | TexasRed-TGCCATACATTGTCCTGACAAATTGAAT-DDQ2    |
| <i>Entamoeba histolytica</i> | ss-rRNA     | Forward primer           | AACAGTAATAGTTTCTTTGGTTAGTAAAA                 |
|                              |             | Reverse primer           | CTTAGAATGTCATTTCTCAATTCAT                     |
|                              |             | Probe                    | Hex-ATTAGTACAAAATGGCCAATTCATTCA-Dark Quencher |
| <b>Organism</b>              | <b>Gene</b> | <b>Primer/Probe name</b> | <b>Sequence</b>                               |
| <i>Giardia lamblia</i>       | ss-rRNA     | Forward primer           | GACGGCTCAGGACAACGGTT                          |
|                              |             | Reverse primer           | TTGCCAGCGGTGTCCG                              |
|                              |             | Probe                    | FAM-CCCGCGGGCGGTCCCTGCTAG-DDQ1                |
| <i>Cryptosporidium</i> spp.  | COW P       | Forward primer           | CAAATTGATACCGTTTGTCTTCTG                      |
|                              |             | Reverse primer           | GGCATGTCGATTCTAATTCAGCT                       |
|                              |             | Probe                    | TexasRed-TGCCATACATTGTCCTGACAAATTGAAT-DDQ2    |
| <i>Entamoeba histolytica</i> | ss-rRNA     | Forward primer           | AACAGTAATAGTTTCTTTGGTTAGTAAAA                 |
|                              |             | Reverse primer           | CTTAGAATGTCATTTCTCAATTCAT                     |
|                              |             | Probe                    | Hex-ATTAGTACAAAATGGCCAATTCATTCA-Dark Quencher |

**Supplementary Table 2: Comparison of DNA concentrations for Chelex and Qiagen DNA extraction methods on parasite-positive stool samples stored on Whatman protein saver cards**

| Application Method                     | DNA extraction protocol | <i>G. lamblia</i><br>(n=20)                  | <i>Cryptosporidium</i><br>(n=20)             | <i>E. histolytica</i><br>(n=20)              |
|----------------------------------------|-------------------------|----------------------------------------------|----------------------------------------------|----------------------------------------------|
|                                        |                         | Average DNA concentration ( <u>Min-Max</u> ) | Average DNA concentration ( <u>Min-Max</u> ) | Average DNA concentration ( <u>Min-Max</u> ) |
| Stool stored on Whatman PSC            | Qiagen                  | 76.2 (65.4 – 86.9)                           | 33.3 (28.0 – 38.6)                           | 29.4 (20.1 – 38.6)                           |
|                                        | Chelex                  | 831.3 (769.6 – 893.1)                        | 429.6 (393.4 – 465.7)                        | 710.4 (663.8 – 756.9)                        |
| Stool suspension stored on Whatman PSC | Qiagen                  | 75.8 (68.8 – 82.8)                           | 19.9 (16.4 – 23.4)                           | 30.7 (21.1 – 40.3)                           |
|                                        | Chelex                  | 466.3 (421.7 – 510.9)                        | 230.0 (204.3 – 255.7)                        | 354.1 (325.0 – 383.1)                        |
