# Supplementary material
Source: PubMed Central journal article supplement (PMC6283500)

Supplemental Figure 1. qPCR curves

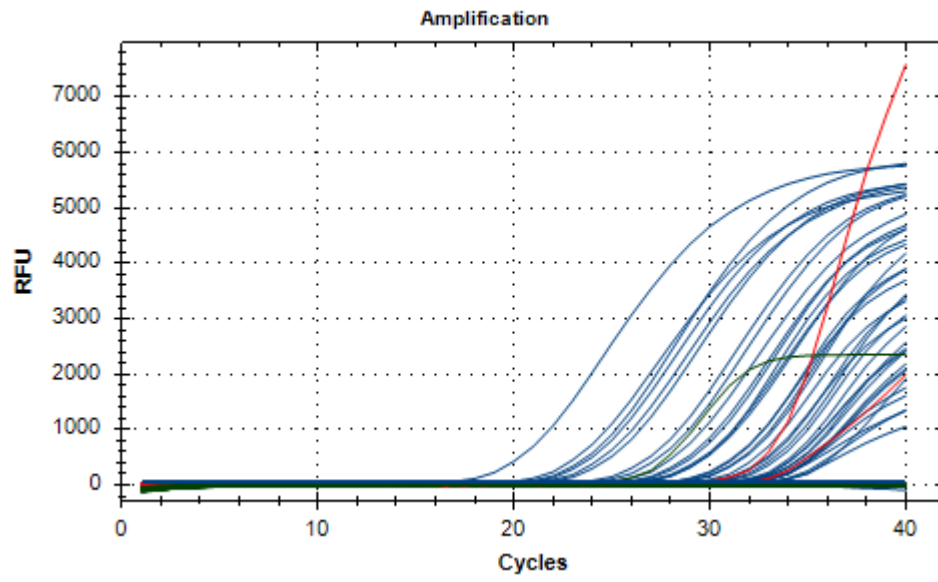

Supplement: tpmd180538.SD1.pdf [file tpmd180538.SD1.pdf]
